# Supplementary material for: Identification and profiling of upland cotton microRNAs at fiber initiation stage under exogenous IAA application
Source: BMC Genomics. 2019 May 28;20:421. doi: 10.1186/s12864-019-5760-8 (PMC6537205; doi:10.1186/s12864-019-5760-8)
Supplement: Supplementary file 5 — Table S4. MiRNAs and the corresponding target genes. (XLSX 30 kb) [file 12864_2019_5760_MOESM5_ESM.xlsx]

## Sheet: Sheet1
	Table S4: miRNAs and the corresponding target genes
	miRNA	target gene
	ghr-miR156a	Gh_A01G1274
	ghr-miR156a	Gh_A01G1281
	ghr-miR156a	Gh_A01G2095
	ghr-miR156a	Gh_A03G0632
	ghr-miR156a	Gh_A03G1083
	ghr-miR156a	Gh_A03G1092
	ghr-miR156a	Gh_A04G0183
	ghr-miR156a	Gh_A04G1266
	ghr-miR156a	Gh_A04G1331
	ghr-miR156a	Gh_A04G1486
	ghr-miR156a	Gh_A06G0796
	ghr-miR156a	Gh_A07G0442
	ghr-miR156a	Gh_A11G0344
	ghr-miR156a	Gh_A11G0706
	ghr-miR156a	Gh_A11G1133
	ghr-miR156a	Gh_A11G2811
	ghr-miR156a	Gh_A12G0866
	ghr-miR156a	Gh_A12G1380
	ghr-miR156a	Gh_A13G0749
	ghr-miR156a	Gh_D01G1229
	ghr-miR156a	Gh_D01G1231
	ghr-miR156a	Gh_D01G1495
	ghr-miR156a	Gh_D01G1503
	ghr-miR156a	Gh_D02G1499
	ghr-miR156a	Gh_D02G1515
	ghr-miR156a	Gh_D03G0920
	ghr-miR156a	Gh_D04G1827
	ghr-miR156a	Gh_D04G1893
	ghr-miR156a	Gh_D04G1985
	ghr-miR156a	Gh_D06G0926
	ghr-miR156a	Gh_D07G0506
	ghr-miR156a	Gh_D08G1755
	ghr-miR156a	Gh_D09G1593
	ghr-miR156a	Gh_D11G0401
	ghr-miR156a	Gh_D11G0821
	ghr-miR156a	Gh_D11G1284
	ghr-miR156a	Gh_D11G3165
	ghr-miR156a	Gh_D12G0947
	ghr-miR156a	Gh_D12G1504
	ghr-miR156a	Gh_D13G0874
	ghr-miR156a	Gh_Sca035233G01
	ghr-miR156c	Gh_A01G1274
	ghr-miR156c	Gh_A01G1281
	ghr-miR156c	Gh_A02G0267
	ghr-miR156c	Gh_A03G0632
	ghr-miR156c	Gh_A03G1083
	ghr-miR156c	Gh_A03G1092
	ghr-miR156c	Gh_A04G1266
	ghr-miR156c	Gh_A04G1331
	ghr-miR156c	Gh_A04G1486
	ghr-miR156c	Gh_A05G3964
	ghr-miR156c	Gh_A07G0442
	ghr-miR156c	Gh_A10G0593
	ghr-miR156c	Gh_A11G0344
	ghr-miR156c	Gh_A11G0706
	ghr-miR156c	Gh_A11G1389
	ghr-miR156c	Gh_A11G2811
	ghr-miR156c	Gh_A12G0866
	ghr-miR156c	Gh_A12G1380
	ghr-miR156c	Gh_A13G0749
	ghr-miR156c	Gh_A13G0927
	ghr-miR156c	Gh_D01G0772
	ghr-miR156c	Gh_D01G1495
	ghr-miR156c	Gh_D01G1503
	ghr-miR156c	Gh_D02G0334
	ghr-miR156c	Gh_D02G1499
	ghr-miR156c	Gh_D02G1515
	ghr-miR156c	Gh_D03G0920
	ghr-miR156c	Gh_D04G1077
	ghr-miR156c	Gh_D04G1827
	ghr-miR156c	Gh_D04G1893
	ghr-miR156c	Gh_D04G1985
	ghr-miR156c	Gh_D05G0080
	ghr-miR156c	Gh_D05G0498
	ghr-miR156c	Gh_D07G0506
	ghr-miR156c	Gh_D08G2278
	ghr-miR156c	Gh_D11G0401
	ghr-miR156c	Gh_D11G0821
	ghr-miR156c	Gh_D11G1534
	ghr-miR156c	Gh_D11G3165
	ghr-miR156c	Gh_D12G0947
	ghr-miR156c	Gh_D12G1504
	ghr-miR156c	Gh_D13G0874
	ghr-miR156c	Gh_Sca035233G01
	ghr-miR160	Gh_A04G0061
	ghr-miR160	Gh_A04G0063
	ghr-miR160	Gh_D05G3622
	ghr-miR160	Gh_D05G3625
	ghr-miR160	Gh_D05G3626
	ghr-miR160	Gh_D05G3628
	ghr-miR160	Gh_D05G3666
	ghr-miR160	Gh_D05G3667
	ghr-miR160	Gh_Sca005423G01
	ghr-miR162a	Gh_A02G0063
	ghr-miR162a	Gh_A03G1764
	ghr-miR162a	Gh_A10G1800
	ghr-miR164	Gh_A01G0250
	ghr-miR164	Gh_A01G0440
	ghr-miR164	Gh_A05G0827
	ghr-miR164	Gh_A08G0092
	ghr-miR164	Gh_A11G1044
	ghr-miR164	Gh_A11G1954
	ghr-miR164	Gh_A11G2580
	ghr-miR164	Gh_A12G1620
	ghr-miR164	Gh_A13G1259
	ghr-miR164	Gh_D01G0249
	ghr-miR164	Gh_D01G0448
	ghr-miR164	Gh_D05G0948
	ghr-miR164	Gh_D08G0134
	ghr-miR164	Gh_D11G1199
	ghr-miR164	Gh_D11G2947
	ghr-miR164	Gh_D12G1761
	ghr-miR164	Gh_D13G1561
	ghr-miR166b	Gh_A03G0276
	ghr-miR166b	Gh_A05G0892
	ghr-miR166b	Gh_A05G1085
	ghr-miR166b	Gh_A05G2939
	ghr-miR166b	Gh_A06G0741
	ghr-miR166b	Gh_A06G0833
	ghr-miR166b	Gh_A07G0163
	ghr-miR166b	Gh_A08G1765
	ghr-miR166b	Gh_A10G0035
	ghr-miR166b	Gh_A12G1401
	ghr-miR166b	Gh_A13G1004
	ghr-miR166b	Gh_D03G1290
	ghr-miR166b	Gh_D04G0727
	ghr-miR166b	Gh_D05G0479
	ghr-miR166b	Gh_D05G0975
	ghr-miR166b	Gh_D05G1263
	ghr-miR166b	Gh_D06G0966
	ghr-miR166b	Gh_D07G0220
	ghr-miR166b	Gh_D08G2109
	ghr-miR166b	Gh_D10G0038
	ghr-miR166b	Gh_D12G2773
	ghr-miR167a	Gh_A05G0566
	ghr-miR167a	Gh_A12G0194
	ghr-miR167a	Gh_A13G0215
	ghr-miR167a	Gh_A13G0217
	ghr-miR167a	Gh_A13G2080
	ghr-miR167a	Gh_D02G1601
	ghr-miR167a	Gh_D05G0695
	ghr-miR167a	Gh_D07G1785
	ghr-miR167a	Gh_D13G0230
	ghr-miR169a	Gh_A03G0674
	ghr-miR169a	Gh_A05G2568
	ghr-miR169a	Gh_A08G2472
	ghr-miR169a	Gh_A12G0466
	ghr-miR169a	Gh_D03G0835
	ghr-miR169a	Gh_D03G1721
	ghr-miR169a	Gh_D05G2855
	ghr-miR169a	Gh_D08G0995
	ghr-miR169a	Gh_D12G0468
	ghr-miR169b	Gh_A03G0674
	ghr-miR169b	Gh_A05G2675
	ghr-miR169b	Gh_A08G0647
	ghr-miR169b	Gh_A08G2472
	ghr-miR169b	Gh_A12G2523
	ghr-miR169b	Gh_D01G1456
	ghr-miR169b	Gh_D03G0835
	ghr-miR169b	Gh_D05G2975
	ghr-miR169b	Gh_D08G0995
	ghr-miR169b	Gh_D12G0040
	ghr-miR169b	Gh_D12G0468
	ghr-miR172	Gh_A01G1867
	ghr-miR172	Gh_A02G1495
	ghr-miR172	Gh_A03G0292
	ghr-miR172	Gh_A05G0861
	ghr-miR172	Gh_A05G1000
	ghr-miR172	Gh_A08G2566
	ghr-miR172	Gh_A10G0222
	ghr-miR172	Gh_A10G0822
	ghr-miR172	Gh_A10G1860
	ghr-miR172	Gh_A11G0683
	ghr-miR172	Gh_A11G1795
	ghr-miR172	Gh_A12G0670
	ghr-miR172	Gh_A13G1731
	ghr-miR172	Gh_D01G2112
	ghr-miR172	Gh_D03G0218
	ghr-miR172	Gh_D03G1282
	ghr-miR172	Gh_D05G0915
	ghr-miR172	Gh_D05G1119
	ghr-miR172	Gh_D05G3873
	ghr-miR172	Gh_D08G0014
	ghr-miR172	Gh_D10G0938
	ghr-miR172	Gh_D10G2123
	ghr-miR172	Gh_D10G2289
	ghr-miR172	Gh_D11G0245
	ghr-miR172	Gh_D11G1956
	ghr-miR172	Gh_D12G0675
	ghr-miR172	Gh_D13G2079
	ghr-miR2948-5p	Gh_D07G0673
	ghr-miR2948-5p	Gh_D10G0808
	ghr-miR2949a-3p	Gh_A01G0901
	ghr-miR2949a-3p	Gh_A09G0936
	ghr-miR2949a-3p	Gh_A11G0715
	ghr-miR2949a-3p	Gh_D01G0190
	ghr-miR2949a-3p	Gh_D01G0940
	ghr-miR2949a-3p	Gh_D09G0963
	ghr-miR2949a-5p	Gh_A09G0440
	ghr-miR2949a-5p	Gh_A09G1163
	ghr-miR2949a-5p	Gh_A10G2007
	ghr-miR2949a-5p	Gh_A11G2543
	ghr-miR2949a-5p	Gh_A11G3268
	ghr-miR2949a-5p	Gh_A12G2062
	ghr-miR2949a-5p	Gh_D03G1587
	ghr-miR2949a-5p	Gh_D07G0413
	ghr-miR2949a-5p	Gh_D09G0451
	ghr-miR2949a-5p	Gh_D09G1168
	ghr-miR2949b	Gh_A04G0407
	ghr-miR2949b	Gh_A09G0440
	ghr-miR2949b	Gh_A10G1566
	ghr-miR2949b	Gh_A11G3268
	ghr-miR2949b	Gh_A12G2062
	ghr-miR2949b	Gh_D02G0232
	ghr-miR2949b	Gh_D03G1587
	ghr-miR2949b	Gh_D05G3225
	ghr-miR2949b	Gh_D09G0451
	ghr-miR2949b	Gh_D10G1822
	ghr-miR2949b	Gh_D11G2828
	ghr-miR2949b	Gh_Sca084334G01
	ghr-miR2950	Gh_A06G1391
	ghr-miR2950	Gh_A10G0470
	ghr-miR2950	Gh_A13G0305
	ghr-miR2950	Gh_D10G0493
	ghr-miR2950	Gh_D12G0868
	ghr-miR2950	Gh_D13G0343
	ghr-miR3476-3p	Gh_A04G0958
	ghr-miR3476-3p	Gh_A05G2417
	ghr-miR3476-3p	Gh_A05G2418
	ghr-miR3476-3p	Gh_A05G2681
	ghr-miR3476-3p	Gh_A07G0529
	ghr-miR3476-3p	Gh_A09G0867
	ghr-miR3476-3p	Gh_A11G0871
	ghr-miR3476-3p	Gh_D01G1374
	ghr-miR3476-3p	Gh_D01G1794
	ghr-miR3476-3p	Gh_D04G1502
	ghr-miR3476-3p	Gh_D05G2511
	ghr-miR3476-3p	Gh_D05G2684
	ghr-miR3476-3p	Gh_D09G0891
	ghr-miR3476-3p	Gh_D11G3084
	ghr-miR3476-3p	Gh_D12G2724
	ghr-miR3476-5p	Gh_A03G0079
	ghr-miR3476-5p	Gh_A03G0080
	ghr-miR3476-5p	Gh_A05G2300
	ghr-miR3476-5p	Gh_D02G1737
	ghr-miR3476-5p	Gh_D03G0574
	ghr-miR3476-5p	Gh_D03G1579
	ghr-miR3476-5p	Gh_D05G2560
	ghr-miR3476-5p	Gh_D09G2376
	ghr-miR390a	Gh_A08G2329
	ghr-miR390a	Gh_A10G1180
	ghr-miR390a	Gh_A11G2202
	ghr-miR390a	Gh_A11G2283
	ghr-miR390a	Gh_A11G2714
	ghr-miR390a	Gh_A12G0463
	ghr-miR390a	Gh_D03G0099
	ghr-miR390a	Gh_D05G3835
	ghr-miR390a	Gh_D07G1901
	ghr-miR390a	Gh_D08G1121
	ghr-miR390a	Gh_D08G2304
	ghr-miR390a	Gh_D10G1318
	ghr-miR390a	Gh_D11G2499
	ghr-miR390a	Gh_D11G2590
	ghr-miR390a	Gh_D11G2900
	ghr-miR390a	Gh_D11G3068
	ghr-miR390a	Gh_D12G0466
	ghr-miR390a	Gh_Sca004803G06
	ghr-miR393	Gh_A07G2125
	ghr-miR393	Gh_A08G0390
	ghr-miR393	Gh_A08G0662
	ghr-miR393	Gh_A08G1014
	ghr-miR393	Gh_A11G0586
	ghr-miR393	Gh_A11G1077
	ghr-miR393	Gh_A12G0013
	ghr-miR393	Gh_D07G2334
	ghr-miR393	Gh_D08G0477
	ghr-miR393	Gh_D08G0763
	ghr-miR393	Gh_D08G1288
	ghr-miR393	Gh_D11G0671
	ghr-miR393	Gh_D11G1228
	ghr-miR393	Gh_D12G0014
	ghr-miR394b	Gh_A01G1280
	ghr-miR394b	Gh_A03G0979
	ghr-miR394b	Gh_A03G1090
	ghr-miR394b	Gh_A07G1360
	ghr-miR394b	Gh_D01G1502
	ghr-miR394b	Gh_D02G1512
	ghr-miR394b	Gh_D12G0802
	ghr-miR396a	Gh_A01G1939
	ghr-miR396a	Gh_A03G0146
	ghr-miR396a	Gh_A03G0402
	ghr-miR396a	Gh_A03G1789
	ghr-miR396a	Gh_A05G0397
	ghr-miR396a	Gh_A05G2586
	ghr-miR396a	Gh_A05G2807
	ghr-miR396a	Gh_A06G1496
	ghr-miR396a	Gh_A08G2425
	ghr-miR396a	Gh_A09G2211
	ghr-miR396a	Gh_A10G1044
	ghr-miR396a	Gh_A11G0811
	ghr-miR396a	Gh_A11G2384
	ghr-miR396a	Gh_A12G0775
	ghr-miR396a	Gh_A12G2105
	ghr-miR396a	Gh_D01G2198
	ghr-miR396a	Gh_D02G2222
	ghr-miR396a	Gh_D03G1137
	ghr-miR396a	Gh_D03G1434
	ghr-miR396a	Gh_D04G1039
	ghr-miR396a	Gh_D04G1343
	ghr-miR396a	Gh_D05G0515
	ghr-miR396a	Gh_D06G1862
	ghr-miR396a	Gh_D07G0378
	ghr-miR396a	Gh_D08G0503
	ghr-miR396a	Gh_D08G1060
	ghr-miR396a	Gh_D09G1199
	ghr-miR396a	Gh_D09G2413
	ghr-miR396a	Gh_D10G1476
	ghr-miR396a	Gh_D11G0949
	ghr-miR396a	Gh_D11G2699
	ghr-miR396a	Gh_D11G3019
	ghr-miR396a	Gh_D11G3167
	ghr-miR396a	Gh_D12G0778
	ghr-miR396a	Gh_D12G2276
	ghr-miR396a	Gh_D13G2131
	ghr-miR398	Gh_A08G0049
	ghr-miR398	Gh_A08G2179
	ghr-miR398	Gh_D08G0091
	ghr-miR398	Gh_D08G2546
	ghr-miR398	Gh_D09G1145
	ghr-miR479	Gh_A13G1832
	ghr-miR479	Gh_D05G0135
	ghr-miR479	Gh_D06G1834
	ghr-miR479	Gh_D13G2198
	ghr-miR482a	Gh_A04G0315
	ghr-miR482a	Gh_A04G1309
	ghr-miR482a	Gh_A06G1499
	ghr-miR482a	Gh_A10G1833
	ghr-miR482a	Gh_A11G0935
	ghr-miR482a	Gh_A11G1350
	ghr-miR482a	Gh_A11G2536
	ghr-miR482a	Gh_A11G2557
	ghr-miR482a	Gh_A12G0912
	ghr-miR482a	Gh_A12G1910
	ghr-miR482a	Gh_D01G0354
	ghr-miR482a	Gh_D05G3335
	ghr-miR482a	Gh_D05G3336
	ghr-miR482a	Gh_D05G3338
	ghr-miR482a	Gh_D05G3459
	ghr-miR482a	Gh_D06G1865
	ghr-miR482a	Gh_D07G1633
	ghr-miR482a	Gh_D07G1972
	ghr-miR482a	Gh_D10G0635
	ghr-miR482a	Gh_D10G2275
	ghr-miR482a	Gh_D10G2529
	ghr-miR482a	Gh_D11G1498
	ghr-miR482a	Gh_D11G2889
	ghr-miR482a	Gh_D12G1002
	ghr-miR482a	Gh_D12G2090
	ghr-miR482a	Gh_D13G2207
	ghr-miR482b	Gh_A04G0315
	ghr-miR482b	Gh_A04G1309
	ghr-miR482b	Gh_A10G1193
	ghr-miR482b	Gh_A12G0580
	ghr-miR482b	Gh_D05G3335
	ghr-miR482b	Gh_D05G3336
	ghr-miR482b	Gh_D05G3338
	ghr-miR482b	Gh_D05G3459
	ghr-miR482b	Gh_D10G1306
	ghr-miR482b	Gh_D12G0592
	ghr-miR7485	Gh_A01G1043
	ghr-miR7485	Gh_D01G1436
	ghr-miR7485	Gh_D06G0851
	ghr-miR7485	Gh_D11G2129
	ghr-miR7488	Gh_A03G1730
	ghr-miR7488	Gh_A05G0659
	ghr-miR7488	Gh_A06G1477
	ghr-miR7488	Gh_D02G2163
	ghr-miR7488	Gh_D05G0804
	ghr-miR7488	Gh_D06G1814
	ghr-miR7491	Gh_A11G0474
	ghr-miR7491	Gh_D11G0552
	ghr-miR7492a	Gh_A02G0563
	ghr-miR7492a	Gh_D08G0836
	ghr-miR7492a	Gh_D10G2349
	ghr-miR7492a	Gh_D13G0725
	ghr-miR7493	Gh_A13G1923
	ghr-miR7495a	Gh_A06G0334
	ghr-miR7495a	Gh_A06G0531
	ghr-miR7495a	Gh_A06G0896
	ghr-miR7495a	Gh_A07G0056
	ghr-miR7495a	Gh_D06G0365
	ghr-miR7495a	Gh_D06G0587
	ghr-miR7495a	Gh_D07G0054
	ghr-miR7495a	Gh_D11G3232
	ghr-miR7495a	Gh_D11G3242
	ghr-miR7500	Gh_A03G0296
	ghr-miR7500	Gh_D03G1279
	ghr-miR7501	Gh_A12G0482
	ghr-miR7501	Gh_A12G2360
	ghr-miR7501	Gh_D12G2497
	ghr-miR7502	Gh_A05G0946
	ghr-miR7504a	Gh_A05G0692
	ghr-miR7504a	Gh_D05G0839
	ghr-miR7504b	Gh_A05G0168
	ghr-miR7504b	Gh_D05G0232
	ghr-miR7505	Gh_A03G0525
	ghr-miR7505	Gh_A04G0258
	ghr-miR7505	Gh_A04G0293
	ghr-miR7505	Gh_A04G0297
	ghr-miR7505	Gh_A04G0298
	ghr-miR7505	Gh_A04G0299
	ghr-miR7505	Gh_A04G0300
	ghr-miR7505	Gh_A04G0308
	ghr-miR7505	Gh_A04G0834
	ghr-miR7505	Gh_A04G1306
	ghr-miR7505	Gh_A04G1307
	ghr-miR7505	Gh_A05G3317
	ghr-miR7505	Gh_A06G0659
	ghr-miR7505	Gh_A07G1073
	ghr-miR7505	Gh_A07G1426
	ghr-miR7505	Gh_A08G0577
	ghr-miR7505	Gh_A08G1858
	ghr-miR7505	Gh_A10G1153
	ghr-miR7505	Gh_A10G1155
	ghr-miR7505	Gh_A10G1204
	ghr-miR7505	Gh_A10G1206
	ghr-miR7505	Gh_A10G1256
	ghr-miR7505	Gh_A11G3223
	ghr-miR7505	Gh_D04G0283
	ghr-miR7505	Gh_D04G1333
	ghr-miR7505	Gh_D05G3346
	ghr-miR7505	Gh_D05G3356
	ghr-miR7505	Gh_D05G3359
	ghr-miR7505	Gh_D05G3362
	ghr-miR7505	Gh_D05G3380
	ghr-miR7505	Gh_D05G3389
	ghr-miR7505	Gh_D05G3391
	ghr-miR7505	Gh_D05G3438
	ghr-miR7505	Gh_D08G0673
	ghr-miR7505	Gh_D08G2249
	ghr-miR7505	Gh_D10G1229
	ghr-miR7505	Gh_D10G1292
	ghr-miR7505	Gh_D10G1294
	ghr-miR7505	Gh_D10G1342
	ghr-miR7505	Gh_D10G1344
	ghr-miR7505	Gh_D11G2323
	ghr-miR7505	Gh_D13G0526
	ghr-miR7507	Gh_A02G0435
	ghr-miR7507	Gh_A08G0870
	ghr-miR7507	Gh_D02G0485
	ghr-miR7507	Gh_D08G1056
	ghr-miR7507	Gh_Sca053185G01
	ghr-miR7508	Gh_A03G0554
	ghr-miR7508	Gh_A05G0058
	ghr-miR7508	Gh_A11G0369
	ghr-miR7508	Gh_A11G1047
	ghr-miR7508	Gh_A13G1915
	ghr-miR7508	Gh_D03G0335
	ghr-miR7508	Gh_D03G0976
	ghr-miR7508	Gh_D05G0115
	ghr-miR7508	Gh_D11G0429
	ghr-miR7508	Gh_D11G1203
	ghr-miR7508	Gh_D11G3113
	ghr-miR7508	Gh_D13G2303
	ghr-miR7509	Gh_A13G1063
	ghr-miR7509	Gh_D13G1329
	ghr-miR7510a	Gh_A02G0563
	ghr-miR7510a	Gh_A06G1102
	ghr-miR7510a	Gh_A12G0659
	ghr-miR7510a	Gh_D01G1421
	ghr-miR7510a	Gh_D10G0671
	ghr-miR7510a	Gh_D11G2137
	ghr-miR7510a	Gh_D13G0725
	ghr-miR7510b	Gh_A02G0563
	ghr-miR7510b	Gh_A11G0210
	ghr-miR7510b	Gh_A12G0659
	ghr-miR7510b	Gh_D10G0671
	ghr-miR7510b	Gh_D11G0224
	ghr-miR7510b	Gh_D11G2137
	ghr-miR7510b	Gh_D13G0725
	ghr-miR7511	Gh_A09G1164
	ghr-miR7511	Gh_D09G1169
	ghr-miR7512	Gh_A13G0979
	ghr-miR7512	Gh_D09G0369
	ghr-miR7513	Gh_A09G1839
	ghr-miR7513	Gh_D09G1960
	ghr-miR827a	Gh_A01G1743
	ghr-miR827a	Gh_A07G2141
	ghr-miR827a	Gh_D07G2353
	ghr-miR827a	Gh_D11G1290
	ghr-miR1	Gh_A03G0276
	ghr-miR1	Gh_A05G0892
	ghr-miR1	Gh_A05G1085
	ghr-miR1	Gh_A06G0623
	ghr-miR1	Gh_A06G0741
	ghr-miR1	Gh_A06G0833
	ghr-miR1	Gh_A07G0163
	ghr-miR1	Gh_A08G1765
	ghr-miR1	Gh_A10G0035
	ghr-miR1	Gh_A13G1004
	ghr-miR1	Gh_A13G2011
	ghr-miR1	Gh_D03G1290
	ghr-miR1	Gh_D05G0479
	ghr-miR1	Gh_D05G0975
	ghr-miR1	Gh_D05G1263
	ghr-miR1	Gh_D06G0708
	ghr-miR1	Gh_D06G0966
	ghr-miR1	Gh_D07G0220
	ghr-miR1	Gh_D08G2109
	ghr-miR1	Gh_D10G0038
	ghr-miR1	Gh_D13G2409
	ghr-miR2	Gh_A02G0101
	ghr-miR2	Gh_D02G0122
	ghr-miR2	Gh_D02G0123
	ghr-miR2	Gh_D02G0124
	ghr-miR3	Gh_A03G0276
	ghr-miR3	Gh_A05G0892
	ghr-miR3	Gh_A05G1085
	ghr-miR3	Gh_A05G2939
	ghr-miR3	Gh_A06G0623
	ghr-miR3	Gh_A06G0741
	ghr-miR3	Gh_A06G0833
	ghr-miR3	Gh_A07G0163
	ghr-miR3	Gh_A08G1765
	ghr-miR3	Gh_A10G0035
	ghr-miR3	Gh_A12G1571
	ghr-miR3	Gh_A13G1004
	ghr-miR3	Gh_A13G2011
	ghr-miR3	Gh_D03G1290
	ghr-miR3	Gh_D04G0727
	ghr-miR3	Gh_D05G0479
	ghr-miR3	Gh_D05G0975
	ghr-miR3	Gh_D05G1263
	ghr-miR3	Gh_D06G0708
	ghr-miR3	Gh_D06G0966
	ghr-miR3	Gh_D07G0220
	ghr-miR3	Gh_D08G2109
	ghr-miR3	Gh_D10G0038
	ghr-miR3	Gh_D13G2409
	ghr-miR4	Gh_A07G1222
	ghr-miR4	Gh_A08G0481
	ghr-miR4	Gh_D05G2690
	ghr-miR4	Gh_D07G1325
	ghr-miR4	Gh_Sca121710G01
	ghr-miR5	Gh_A01G1768
	ghr-miR5	Gh_A03G0276
	ghr-miR5	Gh_A05G0892
	ghr-miR5	Gh_A05G1085
	ghr-miR5	Gh_A05G2939
	ghr-miR5	Gh_A06G0623
	ghr-miR5	Gh_A06G0833
	ghr-miR5	Gh_A07G0163
	ghr-miR5	Gh_A08G1765
	ghr-miR5	Gh_A10G0035
	ghr-miR5	Gh_A13G1002
	ghr-miR5	Gh_A13G1004
	ghr-miR5	Gh_D01G2011
	ghr-miR5	Gh_D03G1290
	ghr-miR5	Gh_D04G0727
	ghr-miR5	Gh_D05G0479
	ghr-miR5	Gh_D05G0975
	ghr-miR5	Gh_D05G1263
	ghr-miR5	Gh_D06G0708
	ghr-miR5	Gh_D06G0966
	ghr-miR5	Gh_D07G0220
	ghr-miR5	Gh_D08G2109
	ghr-miR5	Gh_D09G1317
	ghr-miR5	Gh_D10G0038
	ghr-miR5	Gh_D13G1249
	ghr-miR5	Gh_Sca006599G01
	ghr-miR6	Gh_A04G1141
	ghr-miR6	Gh_A05G2443
	ghr-miR6	Gh_A05G3434
	ghr-miR6	Gh_A06G1517
	ghr-miR6	Gh_D04G0157
	ghr-miR6	Gh_D05G2713
	ghr-miR6	Gh_D06G1886
	ghr-miR7	Gh_D02G1462
	ghr-miR7	Gh_D09G1431
	ghr-miR8	Gh_A01G1867
	ghr-miR8	Gh_A02G1495
	ghr-miR8	Gh_A03G0292
	ghr-miR8	Gh_A03G0350
	ghr-miR8	Gh_A05G0861
	ghr-miR8	Gh_A08G2566
	ghr-miR8	Gh_A10G0222
	ghr-miR8	Gh_A10G0822
	ghr-miR8	Gh_A10G1860
	ghr-miR8	Gh_A10G2249
	ghr-miR8	Gh_A11G1795
	ghr-miR8	Gh_A12G0347
	ghr-miR8	Gh_A12G0670
	ghr-miR8	Gh_A12G2412
	ghr-miR8	Gh_A13G1451
	ghr-miR8	Gh_D01G2112
	ghr-miR8	Gh_D03G0218
	ghr-miR8	Gh_D03G1227
	ghr-miR8	Gh_D03G1282
	ghr-miR8	Gh_D05G0915
	ghr-miR8	Gh_D05G3873
	ghr-miR8	Gh_D08G0014
	ghr-miR8	Gh_D10G0536
	ghr-miR8	Gh_D10G0938
	ghr-miR8	Gh_D10G2123
	ghr-miR8	Gh_D10G2289
	ghr-miR8	Gh_D11G1956
	ghr-miR8	Gh_D12G0317
	ghr-miR8	Gh_D12G0675
	ghr-miR9	Gh_A08G0574
	ghr-miR9	Gh_A11G1155
	ghr-miR9	Gh_A13G0708
	ghr-miR9	Gh_D03G1575
	ghr-miR9	Gh_D03G1578
	ghr-miR9	Gh_D08G0670
	ghr-miR9	Gh_D11G1311
	ghr-miR9	Gh_D13G0830
	ghr-miR10	Gh_A03G1351
	ghr-miR10	Gh_A04G0217
	ghr-miR10	Gh_A04G1141
	ghr-miR10	Gh_A05G2443
	ghr-miR10	Gh_A05G3434
	ghr-miR10	Gh_A06G1517
	ghr-miR10	Gh_A08G1343
	ghr-miR10	Gh_A09G1008
	ghr-miR10	Gh_D02G1791
	ghr-miR10	Gh_D04G0157
	ghr-miR10	Gh_D05G2713
	ghr-miR10	Gh_D06G1886
	ghr-miR10	Gh_D08G1638
	ghr-miR10	Gh_D09G1026
	ghr-miR10	Gh_D13G0443
	ghr-miR10	Gh_Sca190978G01
	ghr-miR11	Gh_A05G3194
	ghr-miR11	Gh_A08G0198
	ghr-miR11	Gh_A10G1755
	ghr-miR11	Gh_A11G2858
	ghr-miR11	Gh_A12G0729
	ghr-miR11	Gh_D08G0275
	ghr-miR11	Gh_D10G2028
	ghr-miR11	Gh_D11G1863
	ghr-miR11	Gh_D11G3232
	ghr-miR11	Gh_D11G3242
	ghr-miR12	Gh_A09G0930
	ghr-miR13	Gh_A03G0276
	ghr-miR13	Gh_A05G0892
	ghr-miR13	Gh_A05G1085
	ghr-miR13	Gh_A05G1090
	ghr-miR13	Gh_A05G2939
	ghr-miR13	Gh_A06G0623
	ghr-miR13	Gh_A06G0741
	ghr-miR13	Gh_A06G0833
	ghr-miR13	Gh_A07G0163
	ghr-miR13	Gh_A08G0402
	ghr-miR13	Gh_A08G1765
	ghr-miR13	Gh_A10G0035
	ghr-miR13	Gh_A10G0342
	ghr-miR13	Gh_A10G0385
	ghr-miR13	Gh_A11G1599
	ghr-miR13	Gh_A12G1571
	ghr-miR13	Gh_A13G1004
	ghr-miR13	Gh_A13G2011
	ghr-miR13	Gh_D03G1290
	ghr-miR13	Gh_D04G0727
	ghr-miR13	Gh_D05G0479
	ghr-miR13	Gh_D05G0975
	ghr-miR13	Gh_D05G1263
	ghr-miR13	Gh_D06G0708
	ghr-miR13	Gh_D06G0966
	ghr-miR13	Gh_D07G0220
	ghr-miR13	Gh_D08G0493
	ghr-miR13	Gh_D08G2109
	ghr-miR13	Gh_D10G0038
	ghr-miR13	Gh_D10G0348
	ghr-miR13	Gh_D10G0396
	ghr-miR13	Gh_D11G1756
	ghr-miR13	Gh_D13G2409
	ghr-miR13	Gh_Sca005244G01
	ghr-miR14	Gh_A03G0276
	ghr-miR14	Gh_A05G0892
	ghr-miR14	Gh_A05G1085
	ghr-miR14	Gh_A05G2939
	ghr-miR14	Gh_A06G0741
	ghr-miR14	Gh_A06G0833
	ghr-miR14	Gh_A07G0163
	ghr-miR14	Gh_A08G1765
	ghr-miR14	Gh_A10G0035
	ghr-miR14	Gh_A10G0342
	ghr-miR14	Gh_A12G1401
	ghr-miR14	Gh_A12G1571
	ghr-miR14	Gh_A13G1004
	ghr-miR14	Gh_A13G2011
	ghr-miR14	Gh_D03G1290
	ghr-miR14	Gh_D04G0727
	ghr-miR14	Gh_D05G0479
	ghr-miR14	Gh_D05G0975
	ghr-miR14	Gh_D05G1263
	ghr-miR14	Gh_D06G0966
	ghr-miR14	Gh_D07G0220
	ghr-miR14	Gh_D08G2109
	ghr-miR14	Gh_D10G0038
	ghr-miR14	Gh_D10G0348
	ghr-miR14	Gh_D12G2773
	ghr-miR14	Gh_D13G2409
	ghr-miR16	Gh_A02G0725
	ghr-miR16	Gh_A11G2305
	ghr-miR16	Gh_D02G0769
	ghr-miR16	Gh_D11G2614
	ghr-miR17	Gh_A05G0383
	ghr-miR17	Gh_A05G0554
	ghr-miR17	Gh_A06G0860
	ghr-miR17	Gh_A11G2118
	ghr-miR17	Gh_A11G2119
	ghr-miR17	Gh_A11G2222
	ghr-miR17	Gh_A13G0848
	ghr-miR17	Gh_D04G1534
	ghr-miR17	Gh_D04G1535
	ghr-miR17	Gh_D05G0497
	ghr-miR17	Gh_D06G1002
	ghr-miR17	Gh_D11G2427
	ghr-miR17	Gh_D11G2531
	ghr-miR17	Gh_D13G1049
	ghr-miR17	Gh_D13G1096
	ghr-miR17	Gh_Sca006457G01
	ghr-miR18	Gh_A01G1424
	ghr-miR18	Gh_A08G0838
	ghr-miR18	Gh_A11G3300
	ghr-miR18	Gh_D01G1662
	ghr-miR18	Gh_D04G0243
	ghr-miR18	Gh_D07G0378
	ghr-miR18	Gh_D08G1023
	ghr-miR19	Gh_A01G1695
	ghr-miR19	Gh_A05G3029
	ghr-miR19	Gh_A09G2173
	ghr-miR19	Gh_A11G1768
	ghr-miR19	Gh_D01G1946
	ghr-miR19	Gh_D04G0613
	ghr-miR19	Gh_D09G2383
	ghr-miR19	Gh_D11G1926
	ghr-miR20	Gh_A02G0556
	ghr-miR20	Gh_A02G1527
	ghr-miR20	Gh_A03G0516
	ghr-miR20	Gh_A05G0795
	ghr-miR20	Gh_A09G1956
	ghr-miR20	Gh_A10G1566
	ghr-miR20	Gh_A12G1696
	ghr-miR20	Gh_A13G0634
	ghr-miR20	Gh_D02G0620
	ghr-miR20	Gh_D03G1685
	ghr-miR20	Gh_D04G1291
	ghr-miR20	Gh_D06G0845
	ghr-miR20	Gh_D07G0735
	ghr-miR20	Gh_D09G2161
	ghr-miR20	Gh_D10G1822
	ghr-miR20	Gh_D12G1858
	ghr-miR20	Gh_D13G0219
	ghr-miR20	Gh_D13G0663
	ghr-miR21	Gh_A01G0408
	ghr-miR21	Gh_A01G0655
	ghr-miR21	Gh_A01G0665
	ghr-miR21	Gh_A02G0294
	ghr-miR21	Gh_A03G0605
	ghr-miR21	Gh_A07G0345
	ghr-miR21	Gh_A07G1482
	ghr-miR21	Gh_A09G1171
	ghr-miR21	Gh_A10G1397
	ghr-miR21	Gh_A13G1601
	ghr-miR21	Gh_D01G0414
	ghr-miR21	Gh_D01G0415
	ghr-miR21	Gh_D01G0675
	ghr-miR21	Gh_D02G0358
	ghr-miR21	Gh_D03G0892
	ghr-miR21	Gh_D07G0407
	ghr-miR21	Gh_D07G1585
	ghr-miR21	Gh_D09G1177
	ghr-miR21	Gh_D12G2000
	ghr-miR22	Gh_A01G1274
	ghr-miR22	Gh_A01G1281
	ghr-miR22	Gh_A01G2095
	ghr-miR22	Gh_A03G0632
	ghr-miR22	Gh_A03G1083
	ghr-miR22	Gh_A03G1092
	ghr-miR22	Gh_A04G1266
	ghr-miR22	Gh_A04G1331
	ghr-miR22	Gh_A04G1486
	ghr-miR22	Gh_A05G0537
	ghr-miR22	Gh_A06G0796
	ghr-miR22	Gh_A07G0442
	ghr-miR22	Gh_A07G2329
	ghr-miR22	Gh_A11G0344
	ghr-miR22	Gh_A11G0706
	ghr-miR22	Gh_A11G2374
	ghr-miR22	Gh_A11G2811
	ghr-miR22	Gh_A12G0866
	ghr-miR22	Gh_A12G1380
	ghr-miR22	Gh_A13G0749
	ghr-miR22	Gh_A13G1597
	ghr-miR22	Gh_D01G1231
	ghr-miR22	Gh_D01G1495
	ghr-miR22	Gh_D01G1503
	ghr-miR22	Gh_D02G1499
	ghr-miR22	Gh_D02G1515
	ghr-miR22	Gh_D03G0920
	ghr-miR22	Gh_D04G1827
	ghr-miR22	Gh_D04G1893
	ghr-miR22	Gh_D04G1985
	ghr-miR22	Gh_D05G0671
	ghr-miR22	Gh_D06G0295
	ghr-miR22	Gh_D06G0926
	ghr-miR22	Gh_D07G0196
	ghr-miR22	Gh_D07G0506
	ghr-miR22	Gh_D11G0401
	ghr-miR22	Gh_D11G0821
	ghr-miR22	Gh_D11G2688
	ghr-miR22	Gh_D11G3165
	ghr-miR22	Gh_D12G0947
	ghr-miR22	Gh_D12G1504
	ghr-miR22	Gh_D13G0874
	ghr-miR22	Gh_Sca035233G01
	ghr-miR23	Gh_A05G2301
	ghr-miR24	Gh_A02G0614
	ghr-miR24	Gh_A05G3184
	ghr-miR24	Gh_A11G1901
	ghr-miR24	Gh_D02G0669
	ghr-miR24	Gh_D04G0420
	ghr-miR24	Gh_D11G2071
	ghr-miR25	Gh_A04G0748
	ghr-miR25	Gh_D01G0872
	ghr-miR27	Gh_A10G1916
	ghr-miR27	Gh_A13G1639
	ghr-miR27	Gh_D02G1274
	ghr-miR27	Gh_D11G3437
	ghr-miR27	Gh_D13G2003
	ghr-miR28	Gh_A01G0887
	ghr-miR28	Gh_A01G1659
	ghr-miR28	Gh_A04G1478
	ghr-miR28	Gh_A07G0822
	ghr-miR28	Gh_A07G0823
	ghr-miR28	Gh_A08G1405
	ghr-miR28	Gh_A10G2140
	ghr-miR28	Gh_A11G2938
	ghr-miR28	Gh_D01G1908
	ghr-miR28	Gh_D04G1648
	ghr-miR28	Gh_D06G1951
	ghr-miR28	Gh_D11G3324
	ghr-miR29	Gh_A01G0285
	ghr-miR29	Gh_A02G0363
	ghr-miR29	Gh_A02G0642
	ghr-miR29	Gh_A02G1727
	ghr-miR29	Gh_A03G1953
	ghr-miR29	Gh_A04G0383
	ghr-miR29	Gh_A05G0301
	ghr-miR29	Gh_A05G2111
	ghr-miR29	Gh_A05G2511
	ghr-miR29	Gh_A05G4016
	ghr-miR29	Gh_A06G0759
	ghr-miR29	Gh_A06G0801
	ghr-miR29	Gh_A06G1488
	ghr-miR29	Gh_A06G1508
	ghr-miR29	Gh_A06G1555
	ghr-miR29	Gh_A06G1556
	ghr-miR29	Gh_A07G1109
	ghr-miR29	Gh_A07G2319
	ghr-miR29	Gh_A09G2314
	ghr-miR29	Gh_A10G1621
	ghr-miR29	Gh_A10G1875
	ghr-miR29	Gh_A10G1916
	ghr-miR29	Gh_A10G1917
	ghr-miR29	Gh_A10G1918
	ghr-miR29	Gh_A10G1929
	ghr-miR29	Gh_A11G1224
	ghr-miR29	Gh_A12G2407
	ghr-miR29	Gh_A13G0043
	ghr-miR29	Gh_A13G0055
	ghr-miR29	Gh_A13G0062
	ghr-miR29	Gh_A13G0091
	ghr-miR29	Gh_D02G0172
	ghr-miR29	Gh_D02G0173
	ghr-miR29	Gh_D02G0175
	ghr-miR29	Gh_D02G0177
	ghr-miR29	Gh_D02G0211
	ghr-miR29	Gh_D02G0212
	ghr-miR29	Gh_D02G0689
	ghr-miR29	Gh_D03G0617
	ghr-miR29	Gh_D03G1666
	ghr-miR29	Gh_D04G1032
	ghr-miR29	Gh_D05G0036
	ghr-miR29	Gh_D05G0403
	ghr-miR29	Gh_D05G2790
	ghr-miR29	Gh_D05G3253
	ghr-miR29	Gh_D05G3561
	ghr-miR29	Gh_D06G0894
	ghr-miR29	Gh_D06G0921
	ghr-miR29	Gh_D06G1843
	ghr-miR29	Gh_D06G1882
	ghr-miR29	Gh_D06G1925
	ghr-miR29	Gh_D06G2372
	ghr-miR29	Gh_D06G2386
	ghr-miR29	Gh_D07G0175
	ghr-miR29	Gh_D07G1209
	ghr-miR29	Gh_D09G2008
	ghr-miR29	Gh_D10G0242
	ghr-miR29	Gh_D10G1877
	ghr-miR29	Gh_D10G2144
	ghr-miR29	Gh_D10G2185
	ghr-miR29	Gh_D10G2207
	ghr-miR29	Gh_D10G2209
	ghr-miR29	Gh_D10G2227
	ghr-miR29	Gh_D11G1371
	ghr-miR29	Gh_D11G2848
	ghr-miR29	Gh_D12G1444
	ghr-miR29	Gh_D12G2643
	ghr-miR29	Gh_D13G0064
	ghr-miR29	Gh_D13G0066
	ghr-miR29	Gh_D13G0074
	ghr-miR29	Gh_D13G0077
	ghr-miR29	Gh_D13G0107
	ghr-miR29	Gh_D13G1791
	ghr-miR29	Gh_Sca005219G01
	ghr-miR29	Gh_Sca005287G01
	ghr-miR29	Gh_Sca008554G01
	ghr-miR29	Gh_Sca009673G01
	ghr-miR29	Gh_Sca014817G01
	ghr-miR30	Gh_A02G0614
	ghr-miR30	Gh_A02G1538
	ghr-miR30	Gh_A05G1676
	ghr-miR30	Gh_A06G1459
	ghr-miR30	Gh_A06G1508
	ghr-miR30	Gh_A10G0003
	ghr-miR30	Gh_A11G1901
	ghr-miR30	Gh_A13G1677
	ghr-miR30	Gh_A13G1732
	ghr-miR30	Gh_D02G0669
	ghr-miR30	Gh_D03G0181
	ghr-miR30	Gh_D05G1860
	ghr-miR30	Gh_D06G1360
	ghr-miR30	Gh_D06G1559
	ghr-miR30	Gh_D06G2363
	ghr-miR30	Gh_D11G2071
	ghr-miR30	Gh_D13G2080
	ghr-miR31	Gh_A05G1131
	ghr-miR31	Gh_A12G2540
	ghr-miR31	Gh_D05G1302
	ghr-miR31	Gh_D12G0851
	ghr-miR31	Gh_Sca109334G01
	ghr-miR32	Gh_D11G3150
	ghr-miR34	Gh_A01G1485
	ghr-miR34	Gh_A08G0696
	ghr-miR34	Gh_A08G1429
	ghr-miR34	Gh_A10G1298
	ghr-miR34	Gh_A13G2062
	ghr-miR34	Gh_D01G1723
	ghr-miR34	Gh_D06G1491
	ghr-miR34	Gh_D08G1724
	ghr-miR34	Gh_D11G2286
	ghr-miR34	Gh_D13G2463
	ghr-miR35	Gh_A02G1342
	ghr-miR35	Gh_D03G0477
	ghr-miR35	Gh_D12G1129
	ghr-miR36	Gh_A01G0435
	ghr-miR36	Gh_A05G0937
	ghr-miR36	Gh_A08G2016
	ghr-miR36	Gh_A11G2661
	ghr-miR36	Gh_D01G0443
	ghr-miR36	Gh_D05G1021
	ghr-miR36	Gh_D08G2408
	ghr-miR36	Gh_D10G0339
	ghr-miR36	Gh_D11G3023
	ghr-miR36	Gh_D13G2526
	ghr-miR37	Gh_A04G0748
	ghr-miR39	Gh_A13G1848
	ghr-miR40	Gh_D07G0042
	ghr-miR43	Gh_A05G1350
	ghr-miR44	Gh_A02G0745
	ghr-miR44	Gh_A02G0906
	ghr-miR44	Gh_A05G2955
	ghr-miR44	Gh_A07G2096
	ghr-miR44	Gh_A09G1430
	ghr-miR44	Gh_A12G1061
	ghr-miR44	Gh_A12G2523
	ghr-miR44	Gh_D02G0436
	ghr-miR44	Gh_D02G0787
	ghr-miR44	Gh_D02G1070
	ghr-miR44	Gh_D04G0744
	ghr-miR44	Gh_D07G2501
	ghr-miR44	Gh_D09G1438
	ghr-miR44	Gh_D11G1167
	ghr-miR44	Gh_D12G1184
	ghr-miR44	Gh_Sca048491G01
	ghr-miR45	Gh_A05G0906
	ghr-miR45	Gh_A12G0368
	ghr-miR45	Gh_D05G0989
	ghr-miR46	Gh_A08G1105
	ghr-miR46	Gh_A08G1106
	ghr-miR46	Gh_A10G0203
	ghr-miR46	Gh_D08G1385
	ghr-miR46	Gh_D08G1387
	ghr-miR46	Gh_D09G0881
	ghr-miR46	Gh_Sca054011G01
	ghr-miR48	Gh_A01G1208
	ghr-miR48	Gh_A01G2074
	ghr-miR48	Gh_A04G0888
	ghr-miR48	Gh_A07G2360
	ghr-miR48	Gh_A08G0143
	ghr-miR48	Gh_A08G0932
	ghr-miR48	Gh_A08G1668
	ghr-miR48	Gh_A10G1365
	ghr-miR48	Gh_A10G1815
	ghr-miR48	Gh_A11G0649
	ghr-miR48	Gh_A11G1895
	ghr-miR48	Gh_A12G0672
	ghr-miR48	Gh_A12G1225
	ghr-miR48	Gh_D01G1131
	ghr-miR48	Gh_D01G1325
	ghr-miR48	Gh_D01G1371
	ghr-miR48	Gh_D04G1390
	ghr-miR48	Gh_D05G0915
	ghr-miR48	Gh_D06G0699
	ghr-miR48	Gh_D07G0119
	ghr-miR48	Gh_D07G0503
	ghr-miR48	Gh_D08G0197
	ghr-miR48	Gh_D08G1138
	ghr-miR48	Gh_D08G2016
	ghr-miR48	Gh_D10G2080
	ghr-miR48	Gh_D11G2075
	ghr-miR48	Gh_D12G1350
	ghr-miR48	Gh_Sca004730G01
	ghr-miR48	Gh_Sca012419G01
	ghr-miR48	Gh_Sca098860G01
	ghr-miR49	Gh_A02G0105
	ghr-miR49	Gh_A02G0106
	ghr-miR49	Gh_A03G0378
	ghr-miR49	Gh_A10G0426
	ghr-miR49	Gh_A11G1541
	ghr-miR49	Gh_D02G0128
	ghr-miR49	Gh_D02G0132
	ghr-miR49	Gh_D02G0141
	ghr-miR49	Gh_D11G3491
	ghr-miR49	Gh_D13G0359
	ghr-miR50	Gh_A04G1092
	ghr-miR50	Gh_A05G1127
	ghr-miR50	Gh_A05G3921
	ghr-miR50	Gh_D04G1699
	ghr-miR50	Gh_D05G0657
	ghr-miR50	Gh_D05G1298
	ghr-miR53	Gh_A03G2079
	ghr-miR53	Gh_A05G1977
	ghr-miR53	Gh_A11G2830
	ghr-miR53	Gh_D03G1210
	ghr-miR53	Gh_D05G3819
	ghr-miR53	Gh_D11G3185
	ghr-miR54	Gh_A08G1714
	ghr-miR54	Gh_A11G2543
	ghr-miR54	Gh_A13G1677
	ghr-miR55	Gh_A04G1141
	ghr-miR55	Gh_A05G1236
	ghr-miR55	Gh_A05G2443
	ghr-miR55	Gh_A05G3434
	ghr-miR55	Gh_A06G1068
	ghr-miR55	Gh_A06G1517
	ghr-miR55	Gh_A08G1343
	ghr-miR55	Gh_A09G1008
	ghr-miR55	Gh_A10G0394
	ghr-miR55	Gh_A12G1854
	ghr-miR55	Gh_D04G0157
	ghr-miR55	Gh_D05G1917
	ghr-miR55	Gh_D05G2713
	ghr-miR55	Gh_D05G3486
	ghr-miR55	Gh_D05G3838
	ghr-miR55	Gh_D06G1886
	ghr-miR55	Gh_D08G1638
	ghr-miR55	Gh_D09G1026
	ghr-miR55	Gh_D11G3527
	ghr-miR55	Gh_D12G2024
	ghr-miR59	Gh_A01G0457
	ghr-miR59	Gh_A01G0931
	ghr-miR59	Gh_A07G0276
	ghr-miR59	Gh_A13G1245
	ghr-miR59	Gh_D01G0466
	ghr-miR59	Gh_D07G0332
	ghr-miR59	Gh_D11G3235
	ghr-miR59	Gh_D13G1547
	ghr-miR59	Gh_D13G1558
	ghr-miR61	Gh_A01G0363
	ghr-miR61	Gh_A01G2100
	ghr-miR61	Gh_A02G1336
	ghr-miR61	Gh_A03G1515
	ghr-miR61	Gh_A06G0256
	ghr-miR61	Gh_A06G1549
	ghr-miR61	Gh_A10G1261
	ghr-miR61	Gh_A11G2862
	ghr-miR61	Gh_A11G3087
	ghr-miR61	Gh_A13G1141
	ghr-miR61	Gh_D01G0395
	ghr-miR61	Gh_D01G1241
	ghr-miR61	Gh_D01G1242
	ghr-miR61	Gh_D02G1985
	ghr-miR61	Gh_D03G0469
	ghr-miR61	Gh_D05G0648
	ghr-miR61	Gh_D06G0258
	ghr-miR61	Gh_D06G1919
	ghr-miR61	Gh_D07G1000
	ghr-miR61	Gh_D11G0657
	ghr-miR61	Gh_D11G1568
	ghr-miR61	Gh_D11G3244
	ghr-miR61	Gh_D12G0371
	ghr-miR64	Gh_A04G0315
	ghr-miR64	Gh_A04G1309
	ghr-miR64	Gh_A10G1833
	ghr-miR64	Gh_A11G0935
	ghr-miR64	Gh_A11G1350
	ghr-miR64	Gh_A11G2536
	ghr-miR64	Gh_A11G2557
	ghr-miR64	Gh_A12G0912
	ghr-miR64	Gh_A12G1910
	ghr-miR64	Gh_D01G0354
	ghr-miR64	Gh_D05G3335
	ghr-miR64	Gh_D05G3336
	ghr-miR64	Gh_D05G3338
	ghr-miR64	Gh_D05G3459
	ghr-miR64	Gh_D07G1633
	ghr-miR64	Gh_D07G1972
	ghr-miR64	Gh_D10G0635
	ghr-miR64	Gh_D10G2275
	ghr-miR64	Gh_D10G2529
	ghr-miR64	Gh_D11G1498
	ghr-miR64	Gh_D11G2889
	ghr-miR64	Gh_D12G1002
	ghr-miR64	Gh_D12G2090
	ghr-miR64	Gh_D13G2207
	ghr-miR66	Gh_A02G0531
	ghr-miR67	Gh_A09G1106
	ghr-miR67	Gh_A10G0135
	ghr-miR67	Gh_A12G0524
	ghr-miR67	Gh_D12G0539
	ghr-miR68	Gh_A07G0473
	ghr-miR68	Gh_A09G0112
	ghr-miR68	Gh_A10G0039
	ghr-miR68	Gh_A10G0539
	ghr-miR68	Gh_A10G0948
	ghr-miR68	Gh_A11G1369
	ghr-miR68	Gh_A11G2109
	ghr-miR68	Gh_D07G0538
	ghr-miR68	Gh_D07G1920
	ghr-miR68	Gh_D09G0108
	ghr-miR68	Gh_D09G2380
	ghr-miR68	Gh_D11G1517
	ghr-miR69	Gh_A02G0556
	ghr-miR69	Gh_A05G0795
	ghr-miR69	Gh_A09G1294
	ghr-miR69	Gh_A09G1956
	ghr-miR69	Gh_A10G1566
	ghr-miR69	Gh_A12G1696
	ghr-miR69	Gh_A13G0634
	ghr-miR69	Gh_D02G0620
	ghr-miR69	Gh_D06G0845
	ghr-miR69	Gh_D09G2161
	ghr-miR69	Gh_D10G1822
	ghr-miR69	Gh_D12G1858
	ghr-miR69	Gh_D13G0663
	ghr-miR71	Gh_A01G0953
	ghr-miR71	Gh_A04G0258
	ghr-miR71	Gh_A04G0292
	ghr-miR71	Gh_A04G0293
	ghr-miR71	Gh_A04G0297
	ghr-miR71	Gh_A04G0298
	ghr-miR71	Gh_A04G0299
	ghr-miR71	Gh_A04G0300
	ghr-miR71	Gh_A04G0308
	ghr-miR71	Gh_A04G1306
	ghr-miR71	Gh_A04G1307
	ghr-miR71	Gh_A07G1426
	ghr-miR71	Gh_A08G0577
	ghr-miR71	Gh_A10G1153
	ghr-miR71	Gh_A10G1155
	ghr-miR71	Gh_A10G1204
	ghr-miR71	Gh_A10G1206
	ghr-miR71	Gh_D01G1001
	ghr-miR71	Gh_D05G3346
	ghr-miR71	Gh_D05G3356
	ghr-miR71	Gh_D05G3359
	ghr-miR71	Gh_D05G3362
	ghr-miR71	Gh_D05G3380
	ghr-miR71	Gh_D05G3389
	ghr-miR71	Gh_D05G3391
	ghr-miR71	Gh_D05G3392
	ghr-miR71	Gh_D05G3438
	ghr-miR71	Gh_D08G0673
	ghr-miR71	Gh_D08G2249
	ghr-miR71	Gh_D10G1292
	ghr-miR71	Gh_D10G1294
	ghr-miR71	Gh_D10G1342
	ghr-miR71	Gh_D10G1344
	ghr-miR72	Gh_A01G1695
	ghr-miR72	Gh_A09G2173
	ghr-miR72	Gh_A10G1252
	ghr-miR72	Gh_D01G1946
	ghr-miR72	Gh_D09G2383
	ghr-miR75	Gh_A03G0276
	ghr-miR75	Gh_A05G0892
	ghr-miR75	Gh_A05G1085
	ghr-miR75	Gh_A05G2939
	ghr-miR75	Gh_A06G0833
	ghr-miR75	Gh_A07G0163
	ghr-miR75	Gh_A08G1765
	ghr-miR75	Gh_A10G0035
	ghr-miR75	Gh_A13G1004
	ghr-miR75	Gh_D03G1290
	ghr-miR75	Gh_D04G0727
	ghr-miR75	Gh_D05G0479
	ghr-miR75	Gh_D05G0975
	ghr-miR75	Gh_D05G1263
	ghr-miR75	Gh_D06G0966
	ghr-miR75	Gh_D07G0220
	ghr-miR75	Gh_D08G2109
	ghr-miR75	Gh_D10G0038
	ghr-miR76	Gh_A07G0372
	ghr-miR76	Gh_D07G0434
	ghr-miR77	Gh_A05G0287
	ghr-miR77	Gh_D05G0388
	ghr-miR77	Gh_D11G3235
	ghr-miR78	Gh_D12G0867
	ghr-miR79	Gh_A03G0276
	ghr-miR79	Gh_A05G0892
	ghr-miR79	Gh_A05G1085
	ghr-miR79	Gh_A06G0833
	ghr-miR79	Gh_A07G0163
	ghr-miR79	Gh_A08G1765
	ghr-miR79	Gh_A10G0035
	ghr-miR79	Gh_A12G0037
	ghr-miR79	Gh_A13G1004
	ghr-miR79	Gh_A13G2011
	ghr-miR79	Gh_D03G1290
	ghr-miR79	Gh_D05G0479
	ghr-miR79	Gh_D05G0975
	ghr-miR79	Gh_D05G1263
	ghr-miR79	Gh_D06G0966
	ghr-miR79	Gh_D07G0220
	ghr-miR79	Gh_D08G2109
	ghr-miR79	Gh_D10G0038
	ghr-miR79	Gh_D13G2409
	ghr-miR79	Gh_Sca004717G07
	ghr-miR80	Gh_A05G2993
	ghr-miR80	Gh_A06G1878
	ghr-miR80	Gh_A08G1459
	ghr-miR80	Gh_D04G0785
	ghr-miR80	Gh_D06G0264
	ghr-miR81	Gh_A02G0077
	ghr-miR81	Gh_A02G1175
	ghr-miR81	Gh_A05G3060
	ghr-miR81	Gh_A05G3407
	ghr-miR81	Gh_A06G1851
	ghr-miR81	Gh_A07G1245
	ghr-miR81	Gh_A11G0377
	ghr-miR81	Gh_A11G2092
	ghr-miR81	Gh_A13G1829
	ghr-miR81	Gh_A13G1832
	ghr-miR81	Gh_D02G2087
	ghr-miR81	Gh_D03G1786
	ghr-miR81	Gh_D04G0182
	ghr-miR81	Gh_D04G0384
	ghr-miR81	Gh_D04G0585
	ghr-miR81	Gh_D05G0117
	ghr-miR81	Gh_D06G0144
	ghr-miR81	Gh_D07G1353
	ghr-miR81	Gh_D10G2212
	ghr-miR81	Gh_D11G0437
	ghr-miR81	Gh_D11G2409
	ghr-miR81	Gh_D13G2198
	ghr-miR81	Gh_Sca006097G01
	ghr-miR82	Gh_A01G0656
	ghr-miR82	Gh_A03G0717
	ghr-miR82	Gh_A05G0937
	ghr-miR82	Gh_A08G0216
	ghr-miR82	Gh_A08G2016
	ghr-miR82	Gh_A11G2040
	ghr-miR82	Gh_D05G1021
	ghr-miR82	Gh_D08G2408
	ghr-miR82	Gh_D10G0339
	ghr-miR82	Gh_D11G3023
	ghr-miR82	Gh_D13G2526
